Genetics and population analysis

# PopViz: a webserver for visualizing minor allele frequencies and damage prediction scores of human genetic variations

Peng Zhang<sup>1,\*</sup>, Benedetta Bigio<sup>1</sup>, Franck Rapaport<sup>1</sup>, Shen-Ying Zhang<sup>1</sup>, Jean-Laurent Casanova<sup>1,2,3,4,5</sup>, Laurent Abel<sup>1,2,3</sup>, Bertrand Boisson<sup>1,2,3,\*†</sup> and Yuval Itan<sup>6,7,\*†</sup>

<sup>1</sup>St. Giles Laboratory of Human Genetics of Infectious Diseases, The Rockefeller University, New York, NY 10065, USA, <sup>2</sup>Laboratory of Human Genetics of Infectious Diseases, INSERM UMR1163, Paris 75015, France, <sup>3</sup>Imagine Institute, Paris Descartes University, Paris 75015, France, <sup>4</sup>Howard Hughes Medical Institute, New York, NY 10065, USA, <sup>5</sup>Pediatric Immunology-Hematology Unit, Necker Hospital for Sick Children, Paris 75015, France, <sup>6</sup>The Charles Bronfman Institute for Personalized Medicine and <sup>7</sup>Department of Genetics and Genomics, Icahn School of Medicine at Mount Sinai, New York, NY 10029, USA

\*To whom correspondence should be addressed.

†The authors wish it to be known that, in their opinion, the last two authors should be regarded as Joint Last Authors.

Associate Editor: Oliver Stegle

Received on January 20, 2018; revised on May 29, 2018; editorial decision on June 26, 2018; accepted on June 28, 2018

## Abstract

**Summary:** Next-generation sequencing (NGS) generates large amounts of genomic data and reveals about 20 000 genetic coding variants per individual studied. Several mutation damage prediction scores are available to prioritize variants, but there is currently no application to help investigators to determine the relevance of the candidate genes and variants quickly and visually from population genetics data and deleteriousness scores. Here, we present PopViz, a user-friendly, rapid, interactive, mobile-compatible webserver providing a gene-centric visualization of the variants of any human gene, with (i) population-specific minor allele frequencies from the gnomAD population genetic database; (ii) mutation damage prediction scores from CADD, EIGEN and LINSIGHT and (iii) amino-acid positions and protein domains. This application will be particularly useful in investigations of NGS data for new disease-causing genes and variants, by reinforcing or rejecting the plausibility of the candidate genes, and by selecting and prioritizing, the candidate variants for experimental testing.

**Availability and implementation:** PopViz webserver is freely accessible from <http://shiva.rockefeller.edu/PopViz/>.

**Contact:** pzhang@rockefeller.edu or bebo283@rockefeller.edu or yuval.itan@mssm.edu

**Supplementary information:** [Supplementary data](#) are available at *Bioinformatics* online.

## 1 Introduction

The assessment and prioritization of candidate pathogenic gene variants in next-generation sequencing (NGS) data from patients requires methods for predicting the deleteriousness of the variant and interpreting its minor allele frequencies (MAFs) in a large

reference population (Casanova *et al.*, 2014; MacArthur *et al.*, 2014; Meyts *et al.*, 2016). The Genome Aggregation Database (gnomAD) is a major resource for determining MAFs from the whole-exome sequencing (WES) data for 123 136 individuals from seven populations, and for obtaining variant annotations

(Lek *et al.*, 2016). The Combined Annotation-Dependent Depletion (CADD) method is widely used to estimate the deleteriousness of genetic variants for most categories of molecular consequences (Kircher *et al.*, 2014), rather than just missense predictions as for PolyPhen-2 (Adzhubei *et al.*, 2010) and scale-invariant feature transform (SIFT) (Kumar *et al.*, 2009). CADD v1.3 uses logistic regression to model diverse annotations into a single score for each variant, to reflect its essentiality, without the use of population-based MAF information. In combination with gene-level approaches, such as the mutation significance cutoff (MSC) (Itan *et al.*, 2016), MAF and CADD have been shown to distinguish effectively between benign and potentially damaging variants (Israel *et al.*, 2017). Additional methods, such as EIGEN (Ionita-Laza *et al.*, 2016) and LINSIGHT (Huang *et al.*, 2017), have recently been developed to predict the deleteriousness of coding and non-coding variants, which may have some advantages over CADD. The location of the amino acids encoded by the variant may also have an influence on protein function, as different protein domains have different functions and tolerances to genetic variation, and the distribution of missense variants provides insight into the functional importance of protein regions (Gussow *et al.*, 2016; Sivley *et al.*, 2018). All these predictors therefore present useful information for identifying the variants most likely to be pathogenic.

However, there is currently no online tool for the straightforward visualization of these important predictors for the variants of specific genes. We, therefore, developed a user-friendly application for the rapid integration and visualization of population genetics, mutation damage prediction scores and amino-acid positions. This application should facilitate the assessment of candidate genes and variants for human diseases, and should be particularly useful in searches for new disease-causing genes and variants, by supporting or refuting the plausibility of the candidate genes, and by selecting and prioritizing the candidate variants for experimental test.

## 2 Materials and Methods

The PopViz webserver contains gnomAD.r2.0.2 WES genetic variants, with the following features: pre-calculated mutation damage prediction scores from CADD v1.3, EIGEN v1.1 and LINSIGHT; gene-level benign/damaging cutoff values from MSC; Ensembl\_92 (Zerbino *et al.*, 2017); UniProt\_2018\_01 (The UniProt, 2017); OMIM\_2018\_03 (Amberger *et al.*, 2015) and UCSC liftOver for GRCh37/hg19 to GRCh38/hg38 coordinate conversion (Kent *et al.*, 2002). The following inclusion/exclusion criteria were applied to the variants: (i) PASS in the FILTER field of the VCF file; (ii) in the canonical transcript; (iii) with gene symbol annotated; (iv) annotated as one of the 14 selected consequences (Supplementary Table S2) and (v) indels of up to 10 nucleotides. The webserver is hosted on an Apache HTTP server, the database is stored and queried by MySQL, the website is written in PHP and HTML, and the visualization is presented by Cascading Style Sheets and JavaScript.

## 3 Results and Discussion

The PopViz webserver provides a user-friendly integrative approach to the rapid extraction and visualization of population

genetics data (global/maximum MAF), mutation damage prediction scores (CADD, EIGEN or LINSIGHT) and amino-acid positions, for variants of any human gene of interest (including variants supplied by the user). It currently includes 13 681 468 variants of 20 437 genes present in both the GRCh37/hg19 and GRCh38/hg38 human reference genomes, and supports seven populations and 14 consequences (Supplementary Section 1). It offers the flexibility of choosing different  $x/y$ -axis parameters for visualization. The options for the  $x$ -axis are: global MAF, maximum MAF and amino-acid position. The choices for the  $y$ -axis are: CADD, EIGEN, LINSIGHT, global MAF and maximum MAF. Visualization can be customized by multiple search options: MAF range, mode of inheritance, disease prevalence, population, consequences, MSC cutoff, impact prediction, loss-of-function prediction, heterozygosity and hemizygosity. Users can choose to submit their variants by providing the first five columns (CHROM, POS, ID, REF and ALT) from a VCF file. If amino-acid position is selected, PopViz automatically calculates the amino-acid positions corresponding to the user's mutations on canonical transcripts, based on gene name and genomic position. Figure 1A illustrates the workflow for the development of PopViz.

Following submission of the query, PopViz returns an interactive map of the selected parameters for the variants of a given gene. Users can expand the details of the variant (including SIFT and PolyPhen2), show/hide any consequence, zoom in/out of any region and download/print the plot (Fig. 1B). The variants submitted by the user are integrated into the plot with the other variants of the gene concerned. Information about the gene/protein is provided in addition to the plot, including gene description, protein domains, gene ontology and cross-references to Ensembl, UniProt, OMIM and Human Protein Atlas (Uhlen *et al.*, 2015) databases. The variants can be downloaded in a table with population genetics data and various deleteriousness scores. PopViz is mobile-compatible, offering rapid access to the variants in genes of interest. More details about PopViz (data, statistics, applications and user manual) are provided in the Supplementary Material.

## 4 Conclusion

The PopViz webserver is a freely accessible and user-friendly application for the rapid visualization of population genetics, damage prediction scores and amino-acid positions for genetic variants, and for displaying their variant/gene/protein characteristics. It facilitates the investigation of disease-causing candidate genes and variants in individuals with particular conditions, and the rapid selection of candidate variants for experimental validation. PopViz is a gene-centric approach to test individual genes for the clarity and consistency of visualization, as different human genes differ considerably in terms of their metrics (Itan *et al.*, 2015). The usefulness of PopViz is illustrated by a schematic example and three recent studies (*IRF4* mutations in Whipple's disease (Guerin *et al.*, 2018), *IKZF1* mutations in common variable immunodeficiency (Kuehn *et al.*, 2016) and *DBR1* mutations in herpes simplex encephalitis (Zhang *et al.*, 2018)] in the Supplementary Material. PopViz will be updated in line with the new releases of the resources used, and we also anticipate the integration of additional resources into PopViz.

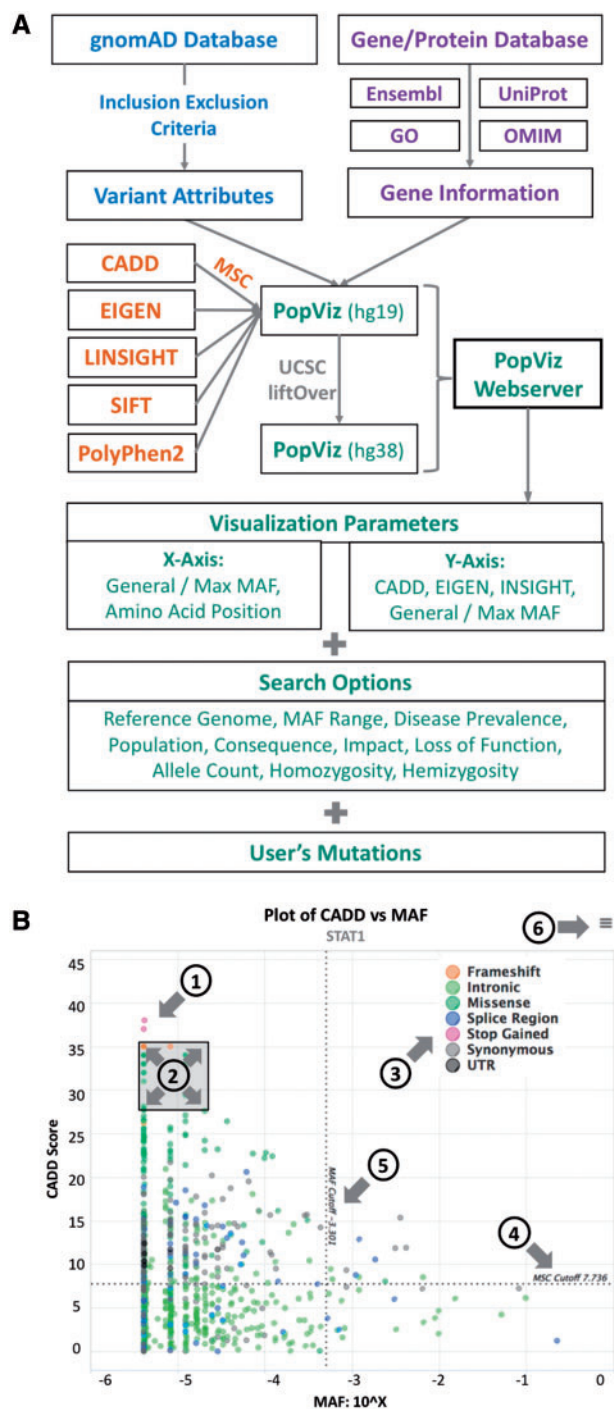

**Fig. 1.** (A) The PopViz webserver workflow. (B) An example of a CADD versus MAF plot for the gene *STAT1*. The plot embeds the following interactive functions: (1) expansion of variant details at each point; (2) zoom in/out of a specific region; (3) show/hide specific consequences; (4) MSC cutoff; (5) MAF cutoff and (6) export plot as an image

## Acknowledgements

We thank S. Boisson-Dupuis, Q. Zhang, L. Shang and R. Yang for discussions, Y. Nemirowskaya and D. Papandrea for administrative support. Z. Yang for artwork. We thank X. Zeng from National University of Singapore for technical assistance.

## Funding

This study was supported in part by the National Institute of Allergy and Infectious Diseases (NIAID) of the National Institutes of Health (NIH) (grants R01AI088364 & P01AI061093), the Rockefeller University, and the Charles Bronfman Institute for Personalized Medicine, Icahn School of Medicine at Mount Sinai.

*Conflict of Interest:* none declared.

## References

- Adzhubei, I.A. *et al.* (2010) A method and server for predicting damaging missense mutations. *Nat. Methods*, **7**, 248–249.
- Amberger, J.S. *et al.* (2015) OMIM.org: online Mendelian Inheritance in Man (OMIM(R)), an online catalog of human genes and genetic disorders. *Nucleic Acids Res.*, **43**, D789–D798.
- Casanova, J.L. *et al.* (2014) Guidelines for genetic studies in single patients: lessons from primary immunodeficiencies. *J. Exp. Med.*, **211**, 2137–2149.
- Guerin, A. *et al.* (2018) IRF4 haploinsufficiency in a family with Whipple's disease. *Elife*, **7**, e32340.
- Gussow, A.B. *et al.* (2016) The intolerance to functional genetic variation of protein domains predicts the localization of pathogenic mutations within genes. *Genome Biol.*, **17**, 9.
- Huang, Y.F. *et al.* (2017) Fast, scalable prediction of deleterious noncoding variants from functional and population genomic data. *Nat. Genet.*, **49**, 618–624.
- Ionita-Laza, I. *et al.* (2016) A spectral approach integrating functional genomic annotations for coding and noncoding variants. *Nat. Genet.*, **48**, 214–220.
- Israel, L. *et al.* (2017) Human Adaptive Immunity Rescues an Inborn Error of Innate Immunity. *Cell*, **168**, 789–800.e10.
- Itan, Y. *et al.* (2016) The mutation significance cutoff: gene-level thresholds for variant predictions. *Nat. Methods*, **13**, 109–110.
- Itan, Y. *et al.* (2015) The human gene damage index as a gene-level approach to prioritizing exome variants. *Proc. Natl. Acad. Sci. USA*, **112**, 13615–13620.
- Kent, W.J. *et al.* (2002) The human genome browser at UCSC. *Genome Res.*, **12**, 996–1006.
- Kircher, M. *et al.* (2014) A general framework for estimating the relative pathogenicity of human genetic variants. *Nat. Genet.*, **46**, 310–315.
- Kuehn, H.S. *et al.* (2016) Loss of B cells in patients with heterozygous mutations in IKAROS. *N. Engl. J. Med.*, **374**, 1032–1043.
- Kumar, P. *et al.* (2009) Predicting the effects of coding non-synonymous variants on protein function using the SIFT algorithm. *Nat. Protoc.*, **4**, 1073–1081.
- Lek, M. *et al.* (2016) Analysis of protein-coding genetic variation in 60,706 humans. *Nature*, **536**, 285–291.
- MacArthur, D.G. *et al.* (2014) Guidelines for investigating causality of sequence variants in human disease. *Nature*, **508**, 469–476.
- Meyts, I. *et al.* (2016) Exome and genome sequencing for inborn errors of immunity. *J. Allergy Clin. Immunol.*, **138**, 957–969.
- Sivley, R.M. *et al.* (2018) Comprehensive analysis of constraint on the spatial distribution of missense variants in human protein structures. *Am. J. Hum. Genet.*, **102**, 415–426.
- The UniProt Consortium. (2017) UniProt: the universal protein knowledge-base. *Nucleic Acids Res.*, **45**, D158–D169.
- Uhlen, M. *et al.* (2015) Proteomics. Tissue-based map of the human proteome. *Science*, **347**, 1260419.
- Zerbino, D.R. *et al.* (2017) Ensembl 2018. *Nucleic Acids Res.*, **46**, D754–D761.
- Zhang, S.Y. *et al.* (2018) Inborn errors of RNA lariat metabolism in humans with brainstem viral infection. *Cell*, **172**, 952–965.
